# Supplementary material for: Ruscogenin Alleviates Myocardial Ischemia-Induced Ferroptosis through the Activation of BCAT1/BCAT2
Source: MDPI journal article supplement (doi:10.3390/antiox11030583), 2022-03-18
Supplement: s1 [file s1]

## Supplementary Information

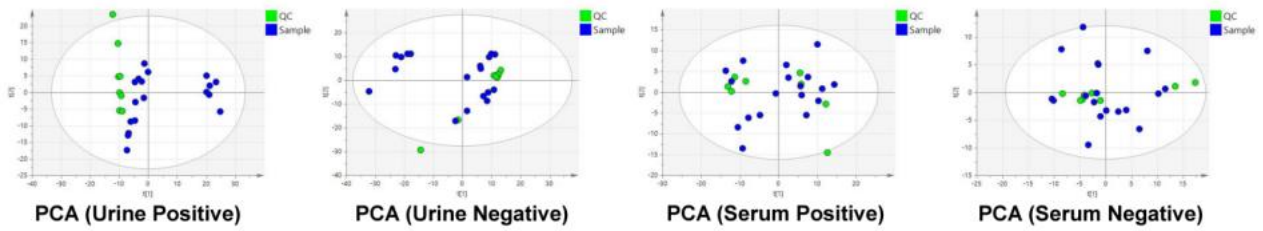

**Supplementary Figure S1.** PCA score plots obtained from the analysis of the QC group (green dots) and other groups (Sham, MI, and MI treated with 0.75 mg/kg RUS: blue dots), based on Q-TOF system (n=6).

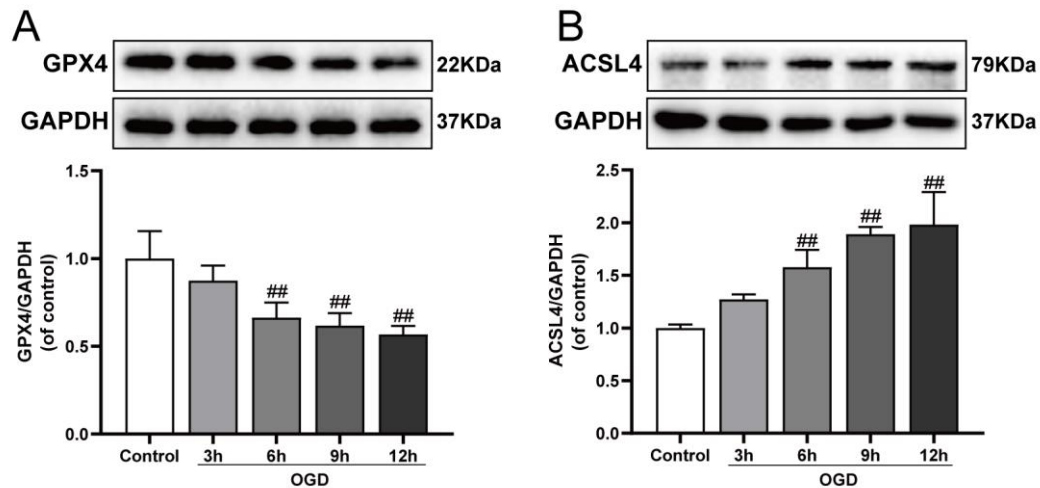

**Supplementary Figure S2.** Changes of the expression of (A) GPX4 and (B) ACSL4 with the prolongation of OGD-injured time in H9c2 cardiomyocytes (n=3-4). Results were expressed as mean  $\pm$  SD. <sup>##</sup> $p < 0.01$  vs. the control group.

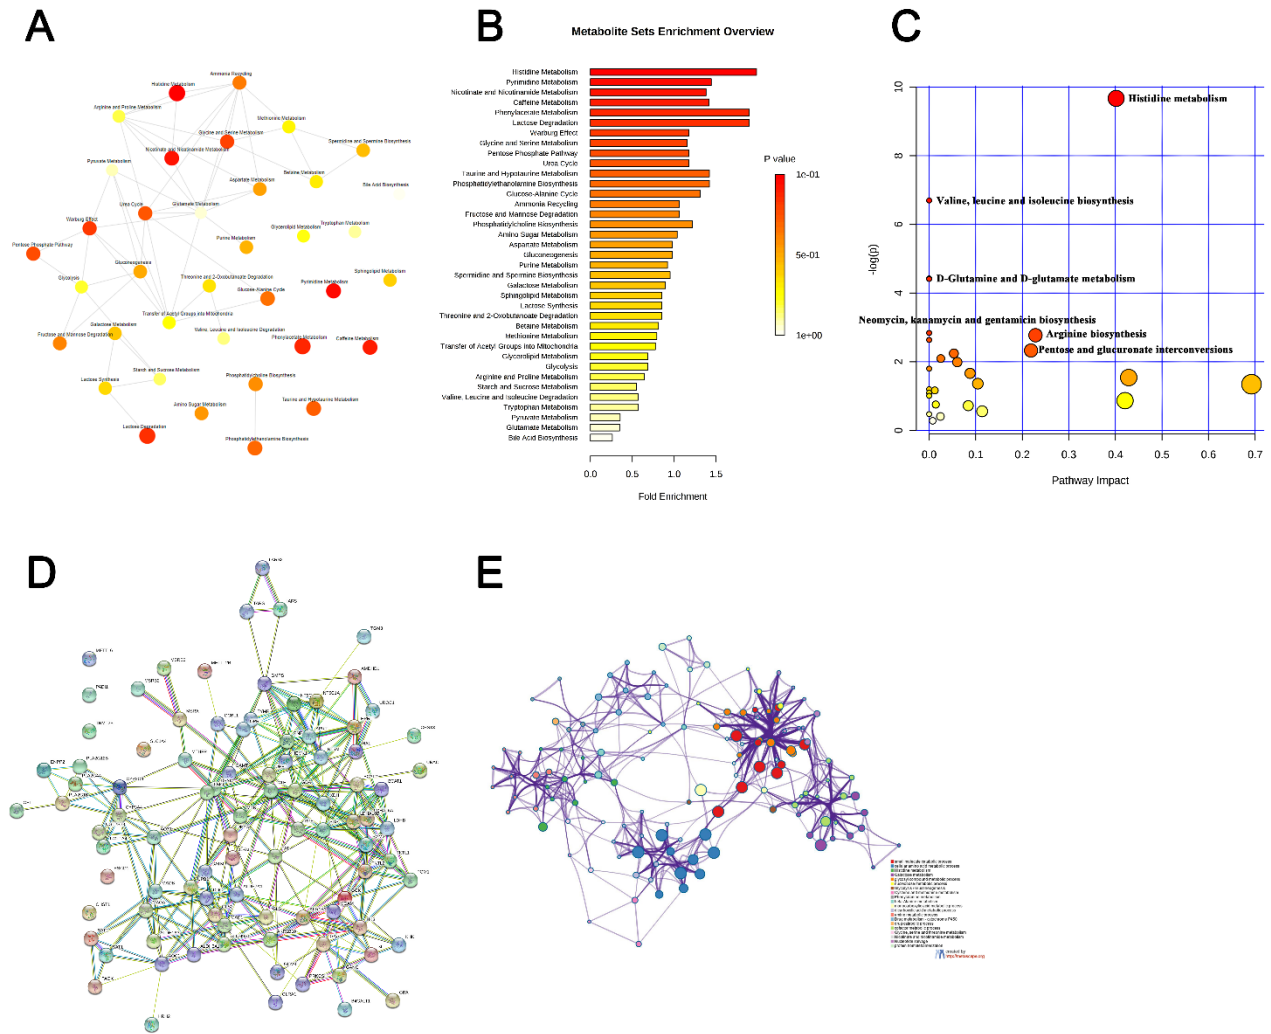

**Supplementary Figure S3. Enrichment analysis of metabolic pathway and regulatory enzymes.**

(A) Network map of metabolic pathway. (B) Overview of pathways related to the differential endogenous metabolites. (C) A summary of pathway analysis by MetPA. (D) Network map of regulatory proteins. (E) GO enrichment analysis of regulatory enzymes.

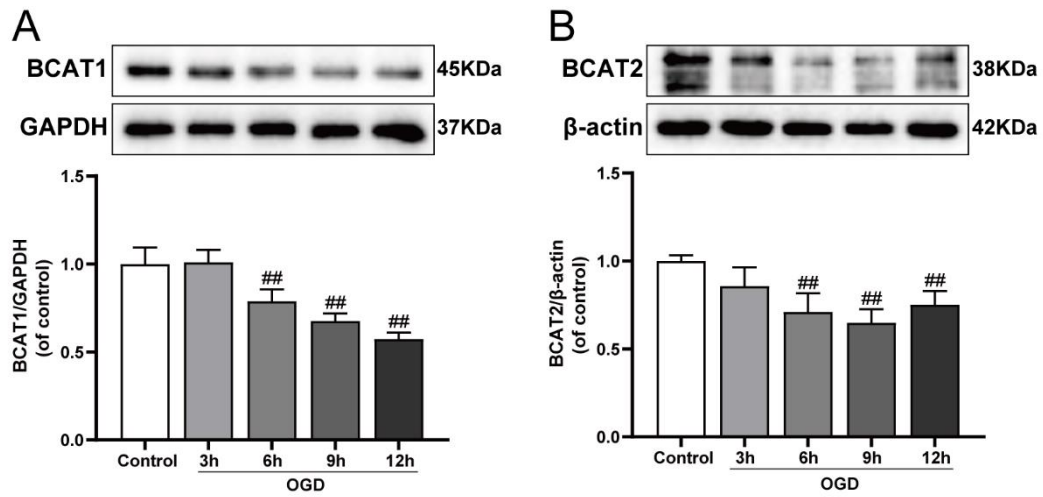

**Supplementary Figure S4.** Changes of the expression of (A) BCAT1 and (B) BCAT2 with the prolongation of OGD-injured time in H9c2 cardiomyocytes (n=3-4). Results were expressed as mean  $\pm$  SD.  $^{##}p < 0.01$  vs. the control group.

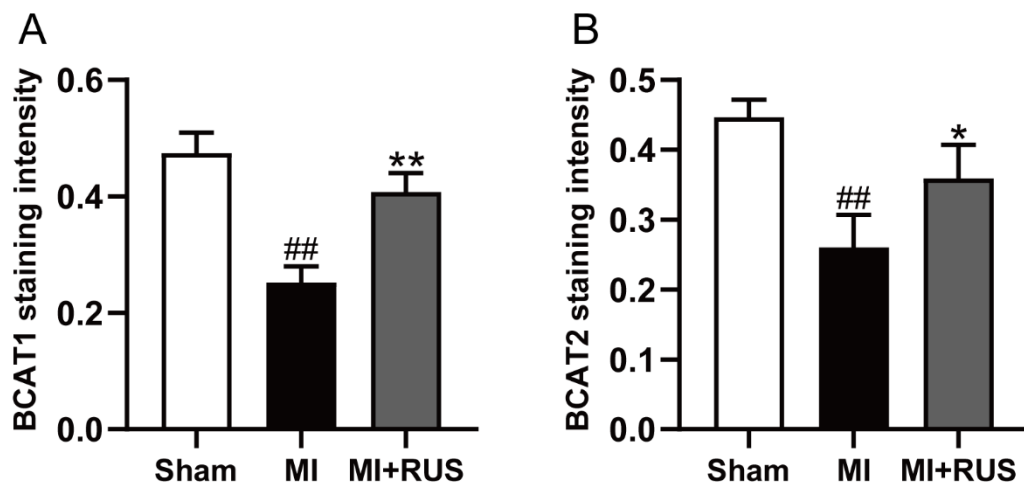

**Supplementary Figure S5.** (A) The relevant statistical results of immunohistochemistry analysis of BCAT1 in Figure 4A (n=3). (B) The relevant statistical results of immunohistochemistry analysis of BCAT2 in Figure 4B (n=3). Results were expressed as mean  $\pm$  SD.  $^{##}p < 0.01$  vs. the sham group,  $^{\#}p < 0.05$ ,  $^{**}p < 0.01$  vs. the MI group.

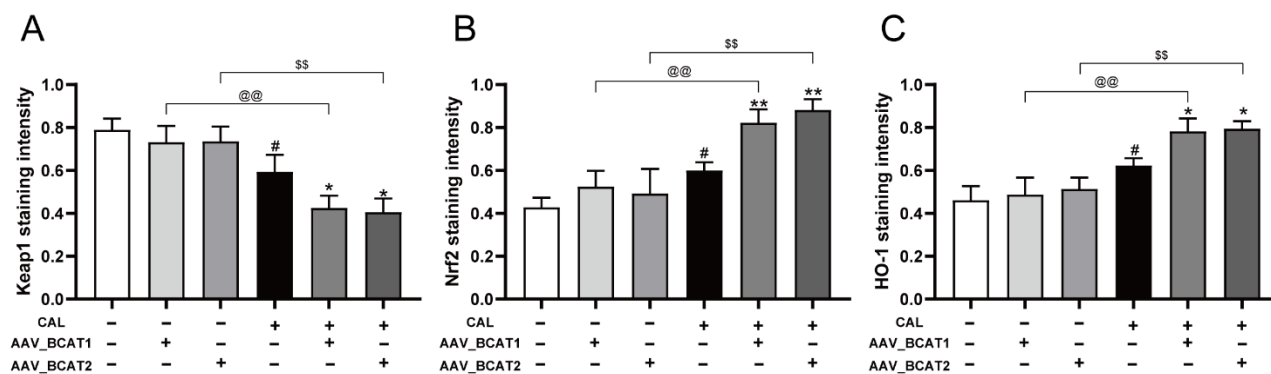

**Supplementary Figure S6.** The relevant statistical results of immunohistochemistry analysis of (A) Keap1, (B) Nrf2 and (C) HO-1 in Figure 6C (n=3). Results were expressed as mean  $\pm$  SD. # $p < 0.05$  vs. the sham group, \* $p < 0.05$ , \*\* $p < 0.01$  vs. the MI group, @@ $p < 0.01$  vs. the group treated with AAV-BCAT1, \$\$ $p < 0.01$  vs. the group treated with AAV-BCAT2.

**Supplementary Table S1. The RSD of retention time and peak area in QC samples**

| Sample-mode    | RSD of retention time (%) | RSD of peak area (%) |
|----------------|---------------------------|----------------------|
| Urine-positive | 0.67                      | 3.71                 |
| Urine-negative | 0.45                      | 3.94                 |
| Serum-positive | 0.36                      | 4.21                 |
| Serum-negative | 0.33                      | 4.74                 |

**Supplementary Table S2. Sequences of siRNAs**

| Gene name | Accession number | siRNA sequence (5' to 3')    |
|-----------|------------------|------------------------------|
| BCAT1     | NM_017253.3      | Forward: GGCUGCAACUAUGGAUCUU |
|           |                  | Reverse: AAGAUCCAUAGUUGCAGCC |
| BCAT2     | NM_022400.2      | Forward: GGAGUGGAACAGCAAGACA |
|           |                  | Reverse: UGUCUUGCUGUUCCACUCC |

**Supplementary Table S3. The parameters for assessing the model quality of OPLS-DA**

| Sample-mode    | R <sup>2</sup> X (cum) | R <sup>2</sup> Y (cum) | Q <sup>2</sup> |
|----------------|------------------------|------------------------|----------------|
| Urine-positive | 0.698                  | 0.997                  | 0.984          |
| Urine-negative | 0.669                  | 0.955                  | 0.964          |
| Serum-positive | 0.786                  | 0.998                  | 0.875          |
| Serum-negative | 0.736                  | 0.995                  | 0.905          |

**Supplementary Table S4. Identification of 58 differential metabolites in urine**

| Ion Mode | Identification             | m/z    | Rt (min) | VIP  | p-value  | FC <sup>b</sup> | Metabolic pathways                                             | Enzymes                                                                                                       | Genes                 |
|----------|----------------------------|--------|----------|------|----------|-----------------|----------------------------------------------------------------|---------------------------------------------------------------------------------------------------------------|-----------------------|
| Positive | N-butrylrglycine           | 748.53 | 2.37     | 1.07 | 3.82E-04 | 1.22            | Histidine Metabolism                                           | Glycine N-acyltransferase; Glycine N-acyltransferase-like protein 1; Glycine N-acyltransferase-like protein 2 | GLYAT; GLYAT1; GLYAT2 |
|          | (3-Arylcarbonyl)-alanine   | 226.14 | 2.36     | 1.41 | 3.93E-07 | 0.60            |                                                                |                                                                                                               |                       |
|          | Methylimidazoleacetic acid | 261.18 | 14.89    | 1.08 | 1.09E-03 | 1.48            |                                                                | Aldehyde dehydrogenase, dimeric NADP-preferring; Aldehyde dehydrogenase family 1 member A3                    | ALDH3A1;ALDH1A3       |
|          | 2-Deoxysepiapterin         | 204.09 | 13.90    | 1.21 | 8.52E-04 | 0.70            |                                                                | Glycine N-acyltransferase; Glycine N-acyltransferase-like protein 1; Glycine N-acyltransferase-like protein 2 | GLYAT; GLYAT1; GLYAT2 |
|          | 2-Methylbutyrylrglycine    | 256.15 | 2.27     | 1.15 | 1.16E-02 | 0.94            |                                                                |                                                                                                               |                       |
|          | 2-Methylguanosine          | 112.05 | 10.69    | 1.42 | 4.69E-11 | 1.75            |                                                                |                                                                                                               |                       |
|          | 3-Methylguanine            | 369.15 | 10.57    | 1.31 | 3.06E-06 | 1.54            |                                                                |                                                                                                               |                       |
|          | 3'-O-Methylguanosine       | 277.12 | 10.93    | 1.31 | 2.53E-05 | 1.34            |                                                                |                                                                                                               |                       |
|          | 4-Guanidinobutanoic acid   | 204.13 | 4.03     | 1.20 | 1.95E-06 | 1.17            |                                                                |                                                                                                               |                       |
|          | Allantoin                  | 60.08  | 5.21     | 1.03 | 4.40E-04 | 1.21            |                                                                | Putative 2-oxo-4-hydroxy-4-carboxy-5-ureidoimidazoline decarboxylase                                          | PRHOXNB               |
|          | L-Arginine                 | 189.09 | 16.35    | 1.31 | 2.39E-04 | 0.88            |                                                                |                                                                                                               |                       |
|          | Cellotriose                | 344.13 | 16.47    | 1.20 | 1.58E-02 | 0.91            |                                                                | Glucosidase 2 subunit beta;Glucosylceramidase; Cytosolic beta-glucosidase                                     | PRKCSH; GBA           |
|          | Creatine                   | 250.16 | 15.09    | 1.37 | 2.74E-06 | 1.85            | Glycine and Serine Metabolism; Arginine and Proline Metabolism | Guanidinoacetate N-methyltransferase; Glycine amidinotransferase, mitochondrial                               | GAMT; GATM;           |

|                            |        |       |      |          |      |                                                                      |                                                                                                                                                                                                                                                                               |                             |
|----------------------------|--------|-------|------|----------|------|----------------------------------------------------------------------|-------------------------------------------------------------------------------------------------------------------------------------------------------------------------------------------------------------------------------------------------------------------------------|-----------------------------|
| Glycylprolylhydroxyproline | 323.14 | 16.82 | 1.26 | 3.51E-04 | 0.88 |                                                                      |                                                                                                                                                                                                                                                                               |                             |
| Guanine                    | 451.16 | 14.01 | 1.42 | 3.88E-08 | 0.70 | Purine Metabolism                                                    | Adenine phosphoribosyltransferase;<br>Hypoxanthine-guanine phosphoribosyltransferase;<br>Guanine deaminase                                                                                                                                                                    | APRT; HPRT1;<br>GDA         |
| Hexanoylglycine            | 233.09 | 2.39  | 1.12 | 8.50E-06 | 1.17 |                                                                      | Glycine N-acyltransferase; Glycine<br>N-acyltransferase-like protein 1;<br>Glycine N-acyltransferase-like protein 2                                                                                                                                                           | GLYAT;<br>GLYAT1;<br>GLYAT2 |
| Histamine                  | 150.06 | 14.32 | 1.43 | 7.45E-11 | 0.59 | Histidine Metabolism                                                 | Aromatic-L-amino-acid decarboxylase;<br>Amiloride-sensitive amine oxidase;<br>Retina-specific copper amine oxidase; Histamine<br>H2 receptor                                                                                                                                  | DDC; ABP1;<br>HRH2          |
| Imidazoleacetic acid       | 307.12 | 6.81  | 1.02 | 2.08E-02 | 0.81 | Histidine Metabolism                                                 | Alpha-aminoadipic semialdehyde dehydrogenase;<br>Aldehyde dehydrogenase family 1 member A3                                                                                                                                                                                    | ALDH9A1;<br>ALDH1A3         |
| Isobutyrylglycine          | 818.61 | 2.39  | 1.38 | 4.96E-08 | 1.83 |                                                                      | Glycine N-acyltransferase; Glycine<br>N-acyltransferase-like protein 1;<br>Glycine N-acyltransferase-like protein 2                                                                                                                                                           | GLYAT;<br>GLYAT1;<br>GLYAT2 |
| L-Alloisoleucine           | 149.11 | 4.66  | 1.35 | 3.28E-04 | 0.75 |                                                                      |                                                                                                                                                                                                                                                                               |                             |
| Ureidoisobutyric acid      | 173.09 | 15.85 | 1.39 | 7.21E-08 | 1.42 | Pyrimidine Metabolism                                                | Dihydropyrimidinase; Beta-ureidopropionase                                                                                                                                                                                                                                    | DPYS; UPB1                  |
| L-Glutamine                | 147.08 | 15.96 | 1.40 | 6.39E-08 | 0.77 | Pyrimidine Metabolism;<br>Glutamate Metabolism;<br>Purine Metabolism | Kynurenine--oxoglutarate transaminase 1; GMP<br>synthase;<br>Protein-glutamine gamma-glutamyltransferase E<br>Branched-chain-amino-acid aminotransferase,<br>cytosolic; Branched-chain-amino-acid<br>aminotransferase, mitochondrial; Isoleucine--tRNA<br>ligase, cytoplasmic | CCBL1; GMPS;<br>TGM3        |
| L-Isoleucine               | 396.16 | 4.26  | 1.31 | 2.88E-04 | 0.70 | Valine, Leucine and<br>Isoleucine Degradation                        | Branched-chain-amino-acid aminotransferase,<br>cytosolic; Branched-chain-amino-acid<br>aminotransferase, mitochondrial; Probable<br>leucine--tRNA ligase, mitochondrial                                                                                                       | BCAT1; BCAT2;<br>IARS;      |
| L-Leucine                  | 226.08 | 14.02 | 1.23 | 7.33E-03 | 0.87 | Valine, Leucine and<br>Isoleucine Degradation                        |                                                                                                                                                                                                                                                                               | BCAT1; BCAT2;<br>LARS2      |

|          |                                   |        |       |      |          |      |                                              |                                                                                                                                                                                                                                                                                                                |                                                                                |
|----------|-----------------------------------|--------|-------|------|----------|------|----------------------------------------------|----------------------------------------------------------------------------------------------------------------------------------------------------------------------------------------------------------------------------------------------------------------------------------------------------------------|--------------------------------------------------------------------------------|
|          | L-Norleucine                      | 76.08  | 4.58  | 1.22 | 6.97E-05 | 1.18 |                                              |                                                                                                                                                                                                                                                                                                                |                                                                                |
|          | Methionine                        | 162.11 | 6.23  | 1.34 | 4.17E-07 | 3.57 | Betaine Metabolism;<br>Methionine Metabolism | Methionine synthase; Methylene-tetrahydrofolate reductase; Tyrosine aminotransferase<br>Diamine acetyltransferase 2; Diamine acetyltransferase 1;<br>Peroxisomal N(1)-acetyl-spermine/spermidine oxidase<br>Carbohydrate sulfotransferase 3; Carbohydrate sulfotransferase 1; Beta-1,4-galactosyltransferase 1 | MTR; MTHFR;<br>TAT<br><br>SAT2; SAT1;<br>PAOX<br><br>CHST3; CHST1;<br>B4GALT1; |
|          | N1-Acetylspermidine               | 398.03 | 14.51 | 1.07 | 3.99E-03 | 1.79 |                                              |                                                                                                                                                                                                                                                                                                                |                                                                                |
|          | N-Acetylglucosamine               | 365.11 | 15.72 | 1.04 | 7.11E-05 | 1.16 |                                              |                                                                                                                                                                                                                                                                                                                |                                                                                |
|          | N-Methyl-4-pyridone-3-carboxamide | 240.16 | 3.28  | 1.12 | 6.94E-05 | 1.24 | Nicotinate and<br>Nicotinamide<br>Metabolism | Aldehyde oxidase                                                                                                                                                                                                                                                                                               | AOX1                                                                           |
|          | Phenylacetylglutamine             | 820.62 | 2.43  | 1.33 | 2.35E-06 | 1.59 |                                              | Glycine N-acyltransferase; Glycine N-acyltransferase-like protein 1;<br>N-acetyltransferase ESCO1                                                                                                                                                                                                              | GLYAT;<br>GLYAT1; ESCO1                                                        |
|          | Ribothymidine                     | 399.20 | 15.31 | 1.27 | 5.96E-05 | 1.73 |                                              | tRNA (uracil(54)-C(5))-methyltransferase homolog                                                                                                                                                                                                                                                               | TRMT2B                                                                         |
|          | Thymine                           | 127.05 | 6.72  | 1.30 | 2.28E-03 | 2.16 | Pyrimidine Metabolism                        | Dihydropyrimidine dehydrogenase; Thymidine phosphorylase                                                                                                                                                                                                                                                       | DPYD; TYMP                                                                     |
|          | Tryptophan                        | 223.09 | 10.73 | 1.44 | 5.45E-13 | 2.57 |                                              |                                                                                                                                                                                                                                                                                                                |                                                                                |
|          | Tyramine glucuronide              | 336.11 | 16.56 | 1.43 | 1.57E-12 | 1.89 |                                              | UDP-glucuronosyltransferase 2B28;<br>UDP-glucuronosyltransferase 2B4;<br>UDP-glucuronosyltransferase 1-4                                                                                                                                                                                                       | UGT2B28;<br>UGT2B24;<br>UGT1A4                                                 |
|          | Urocanic acid                     | 155.13 | 5.21  | 1.13 | 9.73E-05 | 1.26 | Histidine Metabolism;<br>Ammonia Recycling   | Histidine ammonia-lyase; Urocanate hydratase                                                                                                                                                                                                                                                                   | HAL; UROC1                                                                     |
|          | Xanthurenic acid                  | 414.30 | 3.07  | 1.36 | 3.49E-07 | 1.70 | Tryptophan Metabolism                        | HemK methyltransferase family member 1;<br>Methyltransferase-like protein 2B;<br>Methyltransferase-like protein 6                                                                                                                                                                                              | HEMK1;<br>METTL2B;<br>METTL6                                                   |
| Negative | 2-Hydroxyethanesulfonate          | 325.11 | 12.40 | 1.43 | 8.51E-05 | 0.52 |                                              |                                                                                                                                                                                                                                                                                                                |                                                                                |



|                                      |        |       |      |          |       |                                                                                |                                                                                                                                               |                      |
|--------------------------------------|--------|-------|------|----------|-------|--------------------------------------------------------------------------------|-----------------------------------------------------------------------------------------------------------------------------------------------|----------------------|
| 4-Imidazolone-5-propionic acid       | 74.02  | 15.36 | 1.33 | 2.48E-03 | 0.83  | Histidine Metabolism                                                           | Urocanate hydratase; Probable imidazolonepropionase                                                                                           | UROC1; AMDHD1        |
| 5-Acetylamino-6-amino-3-methyluracil | 151.06 | 13.66 | 1.03 | 1.07E-04 | 1.21  | Caffeine Metabolism                                                            |                                                                                                                                               |                      |
| Aminoacetone                         | 251.05 | 15.62 | 1.40 | 3.91E-07 | 1.76  | Glycine and Serine Metabolism                                                  | Amine oxidase [flavin-containing] B; Amine oxidase [flavin-containing] A; Bile salt-activated lipase                                          | MAOB; MAOA; CEL      |
| D-Glutamine                          | 487.19 | 16.00 | 1.39 | 2.82E-05 | 0.68  |                                                                                | Glutaminase liver isoform, mitochondrial; Glutaminase kidney isoform, mitochondrial                                                           | GLS2; GLS            |
| Fructose                             | 397.07 | 13.25 | 1.03 | 3.81E-03 | 1.55  | Amino Sugar Metabolism; Fructose and Mannose Degradation; Galactose Metabolism | Ketohexokinase; Lysosomal alpha-glucosidase; Maltase-glucoamylase, intestinal; Neutral alpha-glucosidase C                                    | KHK; GAA; MGAM; GANC |
| Homocysteinesulfinic acid            | 324.96 | 3.07  | 1.53 | 5.29E-15 | 13.07 |                                                                                |                                                                                                                                               |                      |
| Aspartate-4-phosphate                | 363.02 | 1.79  | 1.38 | 6.19E-04 | 0.88  |                                                                                |                                                                                                                                               |                      |
| L-Galactose                          | 357.03 | 14.08 | 1.44 | 1.32E-07 | 2.02  |                                                                                |                                                                                                                                               |                      |
| Glucose                              | 179.06 | 14.20 | 1.24 | 1.61E-03 | 0.69  | Glycolysis; Galactose Metabolism; Gluconeogenesis                              | Glucokinase; Hexokinase-3; Sucrase-isomaltase, intestinal                                                                                     | GCK; HK3; SI         |
| L-Threonine                          | 118.05 | 15.63 | 1.26 | 1.10E-02 | 0.84  | Glycine and Serine Metabolism                                                  | Threonine--tRNA ligase, cytoplasmic; L-serine dehydratase/L-threonine deaminase; Neutral amino acid transporter A                             | TARS; SDS; SLC1A4    |
| Methionine sulfoxide                 | 302.10 | 16.05 | 1.22 | 1.60E-05 | 1.35  | Methionine Metabolism                                                          | Mitochondrial peptide methionine sulfoxide reductase; Methionine-R-sulfoxide reductase B2, mitochondrial; Methionine-R-sulfoxide reductase B3 | MSRA; MSRB2; MSRB3   |
| Paraxanthine                         | 183.00 | 12.91 | 1.23 | 5.50E-03 | 0.83  | Caffeine Metabolism                                                            | Xanthine dehydrogenase/oxidase; Cytochrome P450 3A4; Cytochrome P450 2C9                                                                      | XDH; CYP3A4; CYP2C9  |

|                      |        |       |      |          |      |                                                                  |                                                                                                                                                                  |                             |
|----------------------|--------|-------|------|----------|------|------------------------------------------------------------------|------------------------------------------------------------------------------------------------------------------------------------------------------------------|-----------------------------|
| p-Cresol sulfate     | 349.00 | 1.69  | 1.41 | 4.71E-08 | 1.64 |                                                                  |                                                                                                                                                                  |                             |
| Quinolinic acid      | 277.04 | 3.11  | 1.28 | 1.41E-02 | 0.90 | Nicotinate and<br>Nicotinamide<br>Metabolism                     | Nicotinate-nucleotide pyrophosphorylase;<br>Kynurenine 3-monooxygenase                                                                                           | QPRT; KMO                   |
| Ribose 1-phosphate   | 165.04 | 3.06  | 1.49 | 2.70E-05 | 0.41 | Pentose Phosphate<br>Pathway; Purine<br>Metabolism               | Phosphoglucomutase-1; Phosphoglucomutase-2;<br>Purine nucleoside phosphorylase;<br>Uridine phosphorylase 1                                                       | PGM1; PGM2;<br>PNP; UPP1    |
| Taurine              | 288.98 | 14.69 | 1.43 | 9.56E-06 | 0.80 | Taurine and Hypotaurine<br>Metabolism; Bile Acid<br>Biosynthesis | Glutamate decarboxylase 1; Cysteine sulfinic acid<br>decarboxylase;<br>Glycine receptor subunit alpha-1<br>Cystathionine gamma-lyase                             | GAD1; CSAD;<br>GLRA1<br>CTH |
| Thiocysteine         | 126.91 | 2.44  | 1.34 | 9.94E-06 | 1.83 |                                                                  |                                                                                                                                                                  |                             |
| Threonic acid        | 116.03 | 6.13  | 1.42 | 6.34E-06 | 0.80 |                                                                  |                                                                                                                                                                  |                             |
| Uridine              | 367.07 | 13.67 | 0.00 | 1.46E+00 | 4.26 | Pyrimidine Metabolism                                            | Cytosolic 5'-nucleotidase 1A;<br>5'(3')-deoxyribonucleotidase, cytosolic type;<br>5'(3')-deoxyribonucleotidase, mitochondrial<br>Xanthine dehydrogenase/oxidase; | NT5C1A; NT5C;<br>NT5M       |
| Xanthine             | 151.02 | 4.64  | 1.51 | 3.62E-08 | 1.66 | Purine Metabolism                                                | Hypoxanthine-guanine phosphoribosyltransferase;<br>Purine nucleoside phosphorylase                                                                               | XDH; HPRT1;<br>PNP          |
| Xylulose 5-phosphate | 245.02 | 3.07  | 1.43 | 2.05E-05 | 0.71 | Pentose Phosphate<br>Pathway                                     | Transketolase-like protein 1; Ribulose-phosphate<br>3-epimerase; Transketolase-like prote 2                                                                      | TKTL1; RPE;<br>TKTL2        |

**RT(min)<sup>a</sup>**: retention time; **FC<sup>b</sup>**: fold change, as calculated by average relative quantitation acquired from MI group/RUS group, and a value more than 1 indicates an increased level in the metabolites of MI group.

**Supplementary Table S5. Identification of 4 differential metabolites in serum**

| Ion Mode | Identification             | m/z    | Rt (min) | VIP  | p-value  | FC <sup>b</sup> | Metabolic pathways                                                                          | Enzymes                                                                                                           | Genes                            |
|----------|----------------------------|--------|----------|------|----------|-----------------|---------------------------------------------------------------------------------------------|-------------------------------------------------------------------------------------------------------------------|----------------------------------|
| Positive | LysoPE(0:0/16:1(9Z))       | 279.23 | 13.25    | 2.14 | 1.48E-03 | 0.78            |                                                                                             | Ectonucleotide<br>pyrophosphatase/phosphodiesterase family<br>member 2                                            | ENPP2                            |
| Negative | Glyceraldehyde             | 711.34 | 6.9869   | 1.99 | 2.23E-07 | 1.62            | Glycerolipid Metabolism;<br>Fructose and Mannose<br>Degradation;<br>Glycerolipid Metabolism | Aldose reductase; 4-trimethylaminobutyraldehyde<br>dehydrogenase;<br>Alpha-aminoadipic semialdehyde dehydrogenase | AKR1B1;<br>ALDH9A1;<br>ALDH7A1   |
|          | L-Lactic acid              | 160.90 | 2.14     | 1.45 | 4.20E-03 | 1.91            | Gluconeogenesis;<br>Pyruvate Metabolism                                                     | L-lactate dehydrogenase A-like 6A; L-lactate<br>dehydrogenase B chain;<br>M-L-lactate dehydrogenase A-like 6B     | LDHAL6A;<br>LDHB; LDHAL6B        |
|          | PE(22: 2(13Z, 16Z)/ 15: 0) | 343.24 | 13.67    | 1.26 | 1.54E-03 | 0.86            |                                                                                             | Cytosolic phospholipase A2; Phospholipase A2;<br>Group XIIB secretory phospholipase A2-like<br>protein            | PLA2G4A;<br>PLA2G1B;<br>PLA2G12B |

**RT(min)<sup>a</sup>:** retention time; **FC<sup>b</sup>:** fold change, as calculated by average relative quantitation acquired from MI group/RUS group, and a value more than 1 indicates an increased level in the metabolites of MI group.
